# Supplementary material for: Marker-Independent Food Identification Enabled by Combing Machine Learning Algorithms with Comprehensive GC × GC/TOF-MS
Source: MDPI journal article supplement (doi:10.3390/molecules27196237), 2022-09-22
Supplement: s1 [file s1]

*Supplementary materials*

# **Marker-Independent Food Identification Enabled by Combing Machine Learning Algorithms with Comprehensive GC × GC/TOF-MS**

Bei Li <sup>1,2</sup>, Miao Liu <sup>3</sup>, Feng Lin <sup>3</sup>, Cui Tai <sup>1</sup>, Yanfei Xiong <sup>3</sup>, Ling Ao <sup>3</sup>, Yumin Liu <sup>4</sup>, Zhixin Lin <sup>1</sup>, Fei Tao <sup>1,\*</sup> and Ping Xu <sup>1</sup>

## **Table of Contents**

Table S1, S-2

Table S2, S-4

Table S3, S-4

Figure S1, S-5

Figure S2, S-6

Figure S3, S-7

\* Corresponding author. Tel.: +86 21 34206647; fax: +86 21 34206647. *E-mail address:* taofei@sjtu.edu.cn (F. Tao)

**Table S1.** Samples were detected in this research.

| Flavor        | Identifier | Brand of Chinese liquor | Abbreviation | Origin            | Serie | Brand in Chinese |
|---------------|------------|-------------------------|--------------|-------------------|-------|------------------|
| Strong flavor | 1          | Wuliangye               | WLY          | Yibin Sichuan     | 21    | 五粮液              |
|               | 2          | Zhijiang Daqu           | ZJDQ         | Zhijiang Hubei    | 3     | 枝江大曲             |
|               | 3          | Baiyunbian              | BYB          | Jingzhou Hubei    | 3     | 白云边              |
|               | 4          | Zhongziju               | ZZ           | Fuyang Anhui      | 9     | 种子酒              |
|               | 5          | Shuanggou               | SG           | Haozhou Anhui     | 12    | 双沟               |
|               | 6          | Jiannanchun             | JNC          | Mianzhu Sichuan   | 12    | 剑南春              |
|               | 7          | Bandaojing              | BDJ          | Zibo Shandong     | 3     | 扳倒井              |
|               | 8          | Laijiangjiu             | LJJ          | Renhuai Guizhou   | 3     | 赖家酱酒             |
|               | 9          | Shuijingfang            | SJF          | Ckengdu Sichuan   | 3     | 水井坊              |
|               | 10         | Gujing Tribute          | GJT          | Haozhou Anhui     | 9     | 古井贡酒             |
|               | 11         | Xiaohu Tuxian           | XHTX         | Renhuai Guizhou   | 3     | 小糊涂仙             |
|               | 12         | Yanghe                  | YH           | Suqian Jiangsu    | 19    | 洋河               |
|               | 13         | Dukang                  | DK           | Luoyang Henan     | 6     | 杜康               |
|               | 14         | Tuopai                  | TP           | Suining Sichuan   | 6     | 沱牌               |
|               | 15         | Langyatai               | LYT          | Qingdao Shandong  | 3     | 琅琊台              |
|               | 16         | Yinianchun              | YNC          | Tongren Guizhou   | 3     | 颐年春              |
|               | 17         | Yingjia Tribute         | YJT          | Huoshan Anhui     | 3     | 迎驾贡酒             |
|               | 18         | Luzhou Laojiao          | LZLJ         | Luzhou Sichuan    | 33    | 泸州老窖             |
|               | 19         | Jingzhi                 | JZ           | Jiangzhi Shandong | 6     | 景芝               |
|               | 20         | Jiuguijiu               | JGJ          | Jishou Hubei      | 3     | 酒鬼酒              |
|               | 21         | Dongjiu                 | DJ           | Zunyi Guizhou     | 3     | 董酒               |

|              |    |              |     |                 |     |     |
|--------------|----|--------------|-----|-----------------|-----|-----|
| Sauce flavor | 22 | Kongfujia    | KFJ | Qufu Shandong   | 6   | 孔府家 |
|              | 23 | Maotaichun   | MTC | Zunyi Guizhou   | 3   | 茅台醇 |
|              | 24 | Maotai       | MT  | Zunyi Guizhou   | 6   | 茅台  |
|              | 25 | Jinsha       | JS  | Bijie Guizhou   | 3   | 金沙  |
|              | 26 | Guotai       | GT  | Renhuai Guizhou | 3   | 国台  |
|              | 27 | Jiangjiu     | JJ  | Renhuai Guizhou | 3   | 酱酒  |
| Fen flavor   | 28 | Fenjiu       | FJ  | Fenyang Shanxi  | 24  | 汾酒  |
|              | 29 | Jiangxiaobai | JXB | Chongqing       | 3   | 江小白 |
|              | 30 | Niulanshan   | NLS | Beijing         | 6   | 牛栏山 |
|              | 31 | Hongxing     | HX  | Beijing         | 3   | 红星  |
|              | 32 | Jingwangwang | JWW | Beijing         | 3   | 京旺旺 |
|              | 33 | Laobaigan    | LBG | Hengshui Hebei  | 6   | 老白干 |
| Site flavor  | 34 | Site         | ST  | Ganzhou Jingxi  | 6   | 四特  |
| Feng flavor  | 35 | Xifeng       | XF  | Baoji Shaanxi   | 12  | 西凤  |
| Mixed flavor | 36 | Kouzi        | KZJ | Huaibei Anhui   | 9   | 口子酒 |
| Total        | 36 |              |     |                 | 262 |     |

**Table S2.** Plackett–Burman experimental design

| Factor                         | Level    |             |           |   |    |
|--------------------------------|----------|-------------|-----------|---|----|
|                                | Low (−1) | Central (0) | High (+1) |   |    |
| A: extraction temperature (°C) | 25       | 42.5        | 60        |   |    |
| B: extraction time (min)       | 15       | 37.5        | 60        |   |    |
| C: incubation time (min)       | 15       | 32.5        | 50        |   |    |
| D: salt addition (M)           | 0        | 1           | 2         |   |    |
| E: alcohol strength (% v/v)    | 10       | 31          | 52        |   |    |
| Run                            | Factor   |             |           |   |    |
|                                | A        | B           | C         | D | E  |
| 1                              | 60       | 60          | 15        | 2 | 10 |
| 2                              | 60       | 15          | 15        | 0 | 10 |
| 3                              | 42.5     | 37.5        | 32.5      | 1 | 31 |
| 4                              | 60       | 60          | 50        | 2 | 52 |
| 5                              | 25       | 15          | 50        | 2 | 10 |
| 6                              | 42.5     | 37.5        | 32.5      | 1 | 31 |
| 7                              | 25       | 60          | 15        | 0 | 52 |
| 8                              | 60       | 15          | 50        | 0 | 52 |
| 9                              | 25       | 60          | 50        | 0 | 10 |
| 10                             | 25       | 15          | 15        | 2 | 52 |

**Table S3.** SVM model results for brands and flavors of Chinese liquors

| Model | Standard | Spectral region ( <i>m/z</i> ) | Accuracy (%) |
|-------|----------|--------------------------------|--------------|
| SVM   | brands   | 20–400                         | 82.56        |
|       |          | 20–200                         | 91.86        |
|       | flavors  | 20–400                         | 95.36        |
|       |          | 20–200                         | 97.67        |

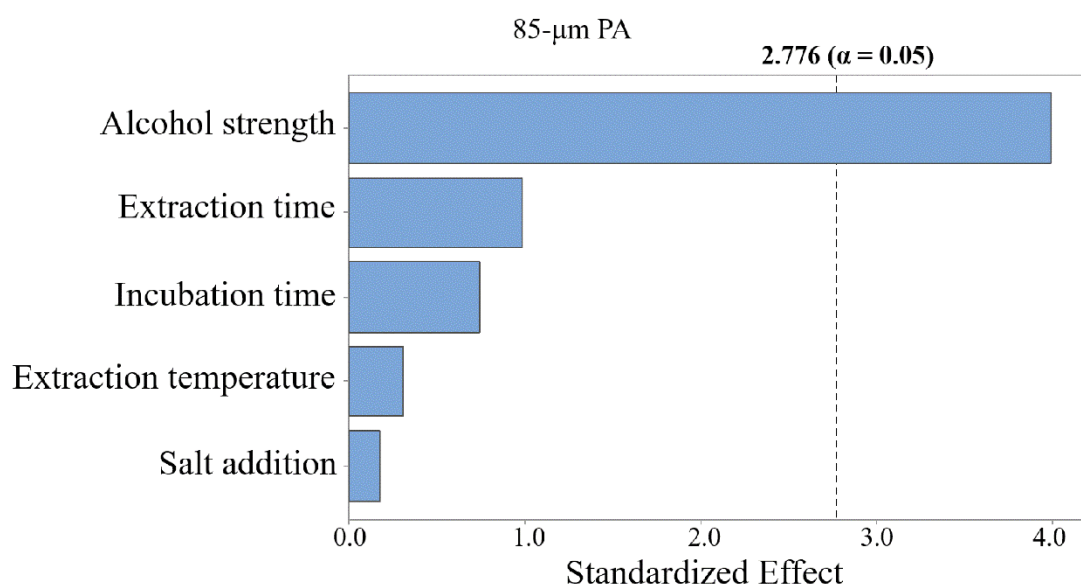

**Figure S1.** Standardized main effect Pareto chart, representing the estimated effects of parameters obtained from the Plackett-Burman (P-B) design for determination of 85- $\mu$ m PA, Vertical line in the chart defines 95% confidence level.

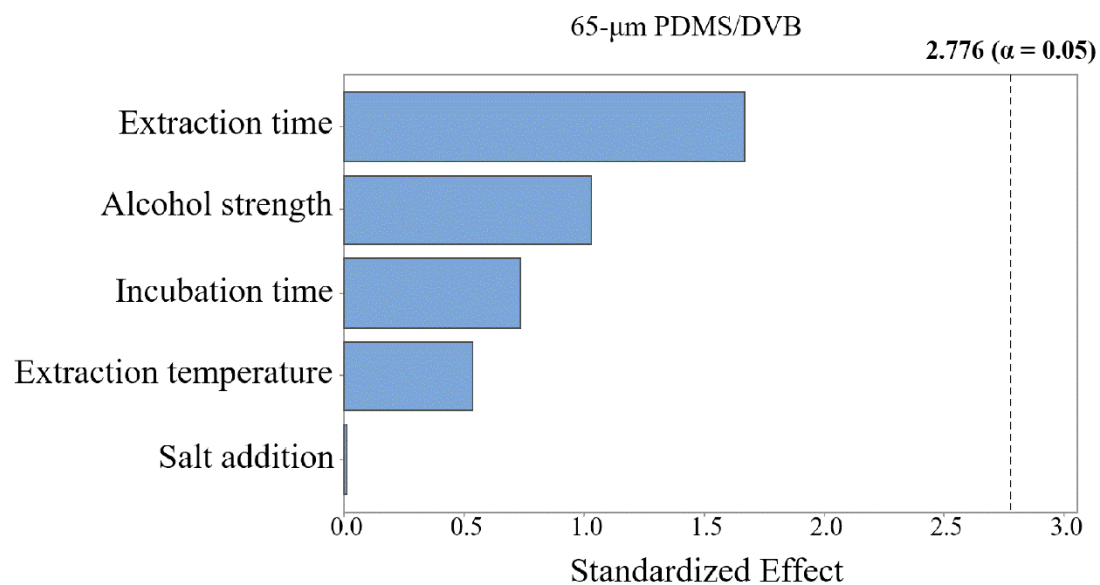

**Figure S2.** Standardized main effect Pareto chart, representing the estimated effects of parameters obtained from the Plackett-Burman (P-B) design for determination of 65- $\mu$ m PDMS/DVB, Vertical line in the chart defines 95% confidence level.

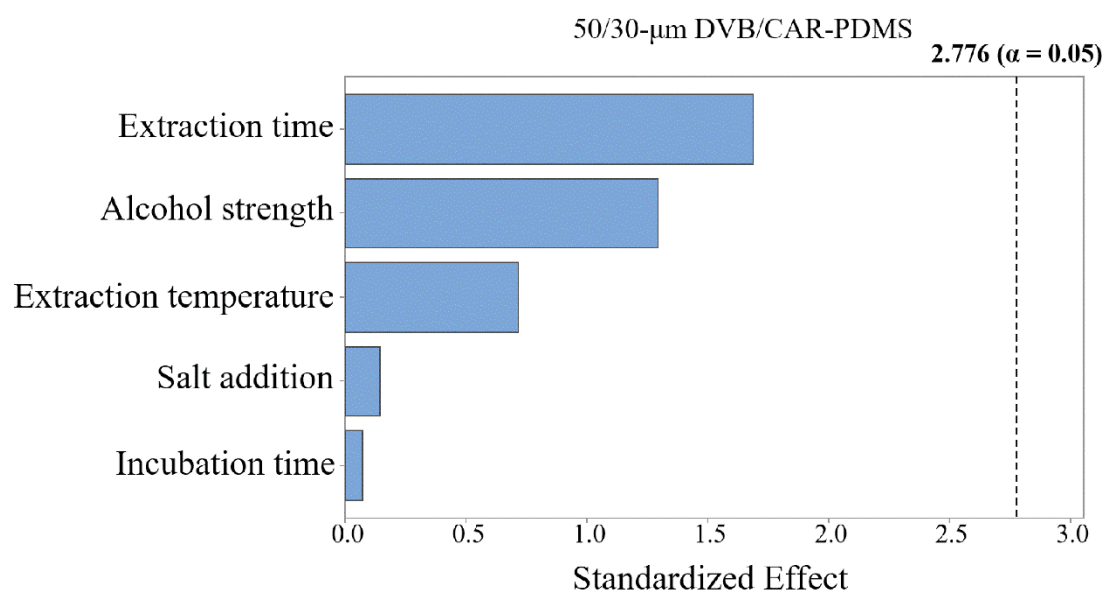

**Figure S3.** Standardized main effect Pareto chart, representing the estimated effects of parameters obtained from the Plackett-Burman (P-B) design for determination of 50/30- $\mu$ m DVB/CAR-PDMS, Vertical line in the chart defines 95% confidence level.
